# Supplementary material for: Donor-stabilised cations, phosphinamide anions, and unusual oxidative cyclisation products from halogenated phosphoranimines and phosphinimines with a bulky 2,4,6-tri-tert-butylphenyl substituent at nitrogen
Source: Royal Society of Chemistry journal article supplement (doi:10.1039/c1dt10641d), 2011-01-01
Supplement: c1dt10641d.pdf [file c1dt10641d.pdf]

## Donor–Stabilised Cations, Phosphinamide Anions, and Unusual Oxidative Cyclisation Products from Halogenated Phosphoranimines and Phosphinimines with a Bulky 2,4,6–Tri–*tert*–butylphenyl Substituent at Nitrogen

Keith Huynh,<sup>†</sup> Cindy P. Chun,<sup>†</sup> Alan J. Lough,<sup>†</sup> and Ian Manners<sup>\*†,‡</sup>

*Contribution from the <sup>†</sup>Davenport Laboratories, Department of Chemistry, University of Toronto, 80 St. George Street, Toronto, Ontario, Canada, M5S 3H6 and the*

*<sup>‡</sup>School of Chemistry, University of Bristol, Bristol BS8 1TS, England*

### Supporting Information

- (1) Table 1. Crystal data and structure refinement for **[9]OTf•CH<sub>2</sub>Cl<sub>2</sub>**
- (2) Table 2. Atomic coordinates and equivalent isotropic displacement parameters for **[9]OTf•CH<sub>2</sub>Cl<sub>2</sub>**
- (3) Table 3. Bond lengths and angles for **[9]OTf•CH<sub>2</sub>Cl<sub>2</sub>**
- (4) Table 4. Anisotropic parameters for **[9]OTf•CH<sub>2</sub>Cl<sub>2</sub>**
- (5) Table 5. Hydrogen coordinates and isotropic displacement parameters for **[9]OTf•CH<sub>2</sub>Cl<sub>2</sub>**
- (6) Table 6. Crystal data and structure refinement for **16**
- (7) Table 7. Atomic coordinates and equivalent isotropic displacement parameters for **16**
- (8) Table 8. Bond lengths and angles for **16**
- (9) Table 9. Anisotropic parameters for **16**
- (10) Table 10. Hydrogen coordinates and isotropic displacement parameters for **16**
- (11) Table 11. Crystal data and structure refinement for **18**

- (12) Table 12. Atomic coordinates and equivalent isotropic displacement parameters for **18**
- (13) Table 13. Bond lengths and angles for **18**
- (14) Table 14. Anisotropic parameters for **18**
- (15) Table 15. Hydrogen coordinates and isotropic displacement parameters for **18**

**Table 1.** Crystal data and structure refinement for [9]OTf•CH<sub>2</sub>Cl<sub>2</sub>.

|                                      |                                                                                                  |                               |
|--------------------------------------|--------------------------------------------------------------------------------------------------|-------------------------------|
| Identification code                  | k0472                                                                                            |                               |
| Empirical formula                    | C <sub>27</sub> H <sub>41</sub> Cl <sub>4</sub> F <sub>3</sub> N <sub>3</sub> O <sub>3</sub> P S |                               |
| Formula weight                       | 717.46                                                                                           |                               |
| Temperature                          | 150(2) K                                                                                         |                               |
| Wavelength                           | 0.71073 Å                                                                                        |                               |
| Crystal system                       | Triclinic                                                                                        |                               |
| Space group                          | P-1                                                                                              |                               |
| Unit cell dimensions                 | $a = 8.7008(2) \text{ \AA}$                                                                      | $\alpha = 98.8000(16)^\circ$  |
|                                      | $b = 10.6081(3) \text{ \AA}$                                                                     | $\beta = 90.9900(18)^\circ$   |
|                                      | $c = 20.7723(6) \text{ \AA}$                                                                     | $\gamma = 112.4650(15)^\circ$ |
| Volume                               | 1744.88(8) Å <sup>3</sup>                                                                        |                               |
| Z                                    | 2                                                                                                |                               |
| Density (calculated)                 | 1.366 Mg/m <sup>3</sup>                                                                          |                               |
| Absorption coefficient               | 0.493 mm <sup>-1</sup>                                                                           |                               |
| $F(000)$                             | 748                                                                                              |                               |
| Crystal size                         | 0.20 x 0.20 x 0.10 mm <sup>3</sup>                                                               |                               |
| Theta range for data collection      | 2.60 to 27.53°                                                                                   |                               |
| Index ranges                         | -11 ≤ $h$ ≤ 11, -13 ≤ $k$ ≤ 13, -26 ≤ $l$ ≤ 26                                                   |                               |
| Reflections collected                | 19547                                                                                            |                               |
| Independent reflections              | 7963 [R(int) = 0.0628]                                                                           |                               |
| Completeness to theta = 27.53°       | 99.0%                                                                                            |                               |
| Absorption correction                | Semi-empirical from equivalents                                                                  |                               |
| Max. and min. transmission           | 0.970 and 0.703                                                                                  |                               |
| Refinement method                    | Full-matrix least-squares on $F^2$                                                               |                               |
| Data / restraints / parameters       | 7963 / 0 / 391                                                                                   |                               |
| Goodness-of-fit on $F^2$             | 1.031                                                                                            |                               |
| Final R indices [ $I > 2\sigma(I)$ ] | R1 = 0.0492, wR2 = 0.1194                                                                        |                               |
| R indices (all data)                 | R1 = 0.0808, wR2 = 0.1391                                                                        |                               |
| Extinction coefficient               | 0.0044(11)                                                                                       |                               |
| Largest diff. peak and hole          | 0.490 and -0.458 e.Å <sup>-3</sup>                                                               |                               |

**Table 2.** Atomic coordinates ( $\times 10^4$ ) and equivalent isotropic displacement parameters ( $\text{\AA}^2 \times 10^3$ ) for [9]OTf•CH<sub>2</sub>Cl<sub>2</sub>. U(eq) is defined as one third of the trace of the orthogonalized U<sup>ij</sup> tensor.

|       | x       | y        | z       | U(eq) |
|-------|---------|----------|---------|-------|
| Cl(1) | 2582(1) | 4830(1)  | 2225(1) | 40(1) |
| Cl(2) | 222(1)  | 6364(1)  | 2484(1) | 39(1) |
| P(1)  | 2656(1) | 6765(1)  | 2423(1) | 26(1) |
| N(1)  | 3401(2) | 7204(2)  | 3235(1) | 26(1) |
| N(2)  | 5572(2) | 8066(2)  | 5119(1) | 29(1) |
| N(3)  | 3566(2) | 7790(2)  | 2021(1) | 27(1) |
| C(1)  | 2639(3) | 6400(3)  | 3693(1) | 31(1) |
| C(2)  | 3291(3) | 6684(3)  | 4312(1) | 31(1) |
| C(3)  | 4836(3) | 7845(2)  | 4527(1) | 26(1) |
| C(4)  | 5541(3) | 8711(2)  | 4055(1) | 28(1) |
| C(5)  | 4846(3) | 8362(2)  | 3434(1) | 26(1) |
| C(6)  | 4919(3) | 7079(3)  | 5571(1) | 36(1) |
| C(7)  | 7111(3) | 9278(3)  | 5360(1) | 34(1) |
| C(8)  | 4624(3) | 8798(2)  | 1679(1) | 24(1) |
| C(9)  | 4476(3) | 10088(2) | 1729(1) | 26(1) |
| C(10) | 5619(3) | 11094(2) | 1422(1) | 29(1) |
| C(11) | 6842(3) | 10873(2) | 1058(1) | 28(1) |
| C(12) | 6896(3) | 9572(2)  | 998(1)  | 28(1) |
| C(13) | 5819(3) | 8508(2)  | 1293(1) | 25(1) |
| C(14) | 3080(3) | 10429(3) | 2071(1) | 31(1) |
| C(15) | 3083(3) | 10327(3) | 2802(1) | 35(1) |
| C(16) | 1374(3) | 9459(3)  | 1714(1) | 38(1) |
| C(17) | 3245(4) | 11919(3) | 2043(2) | 46(1) |
| C(18) | 8041(3) | 11976(3) | 707(1)  | 33(1) |
| C(19) | 8041(5) | 13408(4) | 939(2)  | 79(1) |
| C(20) | 7543(5) | 11567(4) | -22(2)  | 79(1) |
| C(21) | 9825(4) | 12082(4) | 828(2)  | 68(1) |
| C(22) | 5964(3) | 7085(3)  | 1182(1) | 30(1) |
| C(23) | 7285(4) | 7035(3)  | 705(2)  | 43(1) |
| C(24) | 6539(3) | 6800(3)  | 1828(1) | 35(1) |

|       |          |         |         |       |
|-------|----------|---------|---------|-------|
| C(25) | 4303(3)  | 5947(3) | 860(1)  | 36(1) |
| Cl(3) | 9304(1)  | 8165(1) | 3925(1) | 56(1) |
| Cl(4) | 6506(1)  | 5547(1) | 3478(1) | 54(1) |
| C(27) | 8160(4)  | 6489(3) | 4084(2) | 47(1) |
| S(1)  | -381(1)  | 2803(1) | 4132(1) | 39(1) |
| F(1)  | -126(3)  | 2621(2) | 2871(1) | 86(1) |
| F(2)  | -898(4)  | 674(2)  | 3206(1) | 95(1) |
| F(3)  | -2620(2) | 1641(3) | 3143(1) | 78(1) |
| O(1)  | 1312(3)  | 2955(3) | 4224(2) | 76(1) |
| O(2)  | -584(3)  | 4074(2) | 4124(1) | 51(1) |
| O(3)  | -1553(3) | 1884(2) | 4502(1) | 55(1) |
| C(26) | -1041(4) | 1904(3) | 3295(2) | 51(1) |

---

**Table 3.** Bond lengths [Å] and angles [°] for [9]OTf•CH<sub>2</sub>Cl<sub>2</sub>.

---

|             |           |
|-------------|-----------|
| Cl(1)-P(1)  | 2.0065(9) |
| Cl(2)-P(1)  | 2.0044(9) |
| P(1)-N(3)   | 1.467(2)  |
| P(1)-N(1)   | 1.725(2)  |
| N(1)-C(5)   | 1.381(3)  |
| N(1)-C(1)   | 1.383(3)  |
| N(2)-C(3)   | 1.321(3)  |
| N(2)-C(7)   | 1.470(3)  |
| N(2)-C(6)   | 1.472(3)  |
| N(3)-C(8)   | 1.414(3)  |
| C(1)-C(2)   | 1.337(4)  |
| C(2)-C(3)   | 1.439(3)  |
| C(3)-C(4)   | 1.431(3)  |
| C(4)-C(5)   | 1.350(3)  |
| C(8)-C(9)   | 1.410(3)  |
| C(8)-C(13)  | 1.420(3)  |
| C(9)-C(10)  | 1.398(3)  |
| C(9)-C(14)  | 1.548(3)  |
| C(10)-C(11) | 1.387(4)  |
| C(11)-C(12) | 1.385(3)  |
| C(11)-C(18) | 1.531(3)  |
| C(12)-C(13) | 1.396(3)  |
| C(13)-C(22) | 1.545(3)  |
| C(14)-C(15) | 1.538(4)  |
| C(14)-C(16) | 1.541(4)  |
| C(14)-C(17) | 1.541(3)  |
| C(18)-C(20) | 1.518(4)  |
| C(18)-C(19) | 1.521(4)  |
| C(18)-C(21) | 1.527(4)  |
| C(22)-C(24) | 1.536(4)  |
| C(22)-C(23) | 1.542(4)  |
| C(22)-C(25) | 1.543(3)  |
| Cl(3)-C(27) | 1.760(3)  |
| Cl(4)-C(27) | 1.764(3)  |

|                   |            |
|-------------------|------------|
| S(1)-O(1)         | 1.426(2)   |
| S(1)-O(2)         | 1.428(2)   |
| S(1)-O(3)         | 1.440(2)   |
| S(1)-C(26)        | 1.818(4)   |
| F(1)-C(26)        | 1.325(4)   |
| F(2)-C(26)        | 1.342(4)   |
| F(3)-C(26)        | 1.315(4)   |
|                   |            |
| N(3)-P(1)-N(1)    | 114.16(11) |
| N(3)-P(1)-Cl(2)   | 117.20(8)  |
| N(1)-P(1)-Cl(2)   | 101.94(7)  |
| N(3)-P(1)-Cl(1)   | 120.21(9)  |
| N(1)-P(1)-Cl(1)   | 100.08(7)  |
| Cl(2)-P(1)-Cl(1)  | 100.27(4)  |
| C(5)-N(1)-C(1)    | 118.4(2)   |
| C(5)-N(1)-P(1)    | 119.34(16) |
| C(1)-N(1)-P(1)    | 122.16(17) |
| C(3)-N(2)-C(7)    | 122.6(2)   |
| C(3)-N(2)-C(6)    | 121.5(2)   |
| C(7)-N(2)-C(6)    | 115.9(2)   |
| C(8)-N(3)-P(1)    | 172.95(18) |
| C(2)-C(1)-N(1)    | 122.0(2)   |
| C(1)-C(2)-C(3)    | 121.0(2)   |
| N(2)-C(3)-C(4)    | 122.5(2)   |
| N(2)-C(3)-C(2)    | 121.6(2)   |
| C(4)-C(3)-C(2)    | 115.8(2)   |
| C(5)-C(4)-C(3)    | 120.6(2)   |
| C(4)-C(5)-N(1)    | 122.0(2)   |
| C(9)-C(8)-N(3)    | 119.1(2)   |
| C(9)-C(8)-C(13)   | 120.9(2)   |
| N(3)-C(8)-C(13)   | 120.0(2)   |
| C(10)-C(9)-C(8)   | 117.5(2)   |
| C(10)-C(9)-C(14)  | 118.2(2)   |
| C(8)-C(9)-C(14)   | 124.2(2)   |
| C(11)-C(10)-C(9)  | 123.5(2)   |
| C(12)-C(11)-C(10) | 117.0(2)   |

|                   |            |
|-------------------|------------|
| C(12)-C(11)-C(18) | 120.5(2)   |
| C(10)-C(11)-C(18) | 122.5(2)   |
| C(11)-C(12)-C(13) | 123.5(2)   |
| C(12)-C(13)-C(8)  | 117.4(2)   |
| C(12)-C(13)-C(22) | 119.3(2)   |
| C(8)-C(13)-C(22)  | 123.3(2)   |
| C(15)-C(14)-C(16) | 110.1(2)   |
| C(15)-C(14)-C(17) | 105.3(2)   |
| C(16)-C(14)-C(17) | 106.5(2)   |
| C(15)-C(14)-C(9)  | 113.36(19) |
| C(16)-C(14)-C(9)  | 109.2(2)   |
| C(17)-C(14)-C(9)  | 112.2(2)   |
| C(20)-C(18)-C(19) | 109.0(3)   |
| C(20)-C(18)-C(21) | 108.7(3)   |
| C(19)-C(18)-C(21) | 107.3(3)   |
| C(20)-C(18)-C(11) | 109.0(2)   |
| C(19)-C(18)-C(11) | 112.6(2)   |
| C(21)-C(18)-C(11) | 110.2(2)   |
| C(24)-C(22)-C(23) | 105.9(2)   |
| C(24)-C(22)-C(25) | 113.3(2)   |
| C(23)-C(22)-C(25) | 105.4(2)   |
| C(24)-C(22)-C(13) | 110.0(2)   |
| C(23)-C(22)-C(13) | 112.0(2)   |
| C(25)-C(22)-C(13) | 110.06(19) |
| Cl(3)-C(27)-Cl(4) | 111.37(16) |
| O(1)-S(1)-O(2)    | 114.12(15) |
| O(1)-S(1)-O(3)    | 116.22(16) |
| O(2)-S(1)-O(3)    | 114.35(14) |
| O(1)-S(1)-C(26)   | 104.33(17) |
| O(2)-S(1)-C(26)   | 102.73(15) |
| O(3)-S(1)-C(26)   | 102.73(14) |
| F(3)-C(26)-F(1)   | 108.8(3)   |
| F(3)-C(26)-F(2)   | 106.3(3)   |
| F(1)-C(26)-F(2)   | 107.0(3)   |
| F(3)-C(26)-S(1)   | 111.5(2)   |
| F(1)-C(26)-S(1)   | 111.8(2)   |



F(2)-C(26)-S(1)                      111.2(2)

---

Symmetry transformations used to generate equivalent atoms:

**Table 4.** Anisotropic displacement parameters ( $\text{\AA}^2 \times 10^3$ ) for **[9]OTf•CH<sub>2</sub>Cl<sub>2</sub>**. The anisotropic displacement factor exponent takes the form:  $-2\sum [h^2 a^{*2} U^{11} + \dots + 2 h k a^* b^* U^{12}]$

|       | $U^{11}$ | $U^{22}$ | $U^{33}$ | $U^{23}$ | $U^{13}$ | $U^{12}$ |
|-------|----------|----------|----------|----------|----------|----------|
| Cl(1) | 54(1)    | 21(1)    | 45(1)    | 8(1)     | 12(1)    | 12(1)    |
| Cl(2) | 26(1)    | 43(1)    | 43(1)    | 12(1)    | 3(1)     | 9(1)     |
| P(1)  | 27(1)    | 22(1)    | 29(1)    | 6(1)     | 3(1)     | 8(1)     |
| N(1)  | 26(1)    | 23(1)    | 29(1)    | 10(1)    | 3(1)     | 6(1)     |
| N(2)  | 28(1)    | 30(1)    | 30(1)    | 12(1)    | 6(1)     | 9(1)     |
| N(3)  | 31(1)    | 24(1)    | 29(1)    | 8(1)     | 6(1)     | 12(1)    |
| C(1)  | 26(1)    | 26(1)    | 38(1)    | 13(1)    | 6(1)     | 5(1)     |
| C(2)  | 28(1)    | 30(1)    | 35(1)    | 15(1)    | 8(1)     | 6(1)     |
| C(3)  | 27(1)    | 24(1)    | 29(1)    | 8(1)     | 6(1)     | 12(1)    |
| C(4)  | 28(1)    | 23(1)    | 33(1)    | 8(1)     | 4(1)     | 8(1)     |
| C(5)  | 27(1)    | 21(1)    | 31(1)    | 11(1)    | 5(1)     | 7(1)     |
| C(6)  | 37(1)    | 40(2)    | 33(1)    | 17(1)    | 6(1)     | 11(1)    |
| C(7)  | 35(1)    | 30(1)    | 33(1)    | 7(1)     | 1(1)     | 8(1)     |
| C(8)  | 26(1)    | 23(1)    | 21(1)    | 5(1)     | -1(1)    | 8(1)     |
| C(9)  | 30(1)    | 24(1)    | 24(1)    | 3(1)     | 0(1)     | 13(1)    |
| C(10) | 35(1)    | 22(1)    | 30(1)    | 6(1)     | -1(1)    | 11(1)    |
| C(11) | 29(1)    | 28(1)    | 24(1)    | 6(1)     | 0(1)     | 8(1)     |
| C(12) | 30(1)    | 28(1)    | 23(1)    | 5(1)     | 4(1)     | 10(1)    |
| C(13) | 29(1)    | 26(1)    | 21(1)    | 3(1)     | 0(1)     | 12(1)    |
| C(14) | 34(1)    | 26(1)    | 37(1)    | 8(1)     | 7(1)     | 16(1)    |
| C(15) | 40(1)    | 35(1)    | 35(1)    | 2(1)     | 7(1)     | 21(1)    |
| C(16) | 35(1)    | 40(2)    | 44(2)    | 11(1)    | 3(1)     | 19(1)    |
| C(17) | 50(2)    | 36(2)    | 65(2)    | 17(1)    | 18(2)    | 28(1)    |
| C(18) | 37(1)    | 30(1)    | 30(1)    | 11(1)    | 2(1)     | 9(1)     |
| C(19) | 97(3)    | 33(2)    | 104(3)   | 25(2)    | 54(3)    | 15(2)    |
| C(20) | 87(3)    | 75(3)    | 38(2)    | 30(2)    | -8(2)    | -16(2)   |
| C(21) | 41(2)    | 60(2)    | 102(3)   | 45(2)    | 16(2)    | 8(2)     |
| C(22) | 34(1)    | 27(1)    | 32(1)    | 3(1)     | 5(1)     | 15(1)    |
| C(23) | 49(2)    | 33(2)    | 48(2)    | 3(1)     | 17(1)    | 20(1)    |
| C(24) | 35(1)    | 30(1)    | 43(2)    | 8(1)     | 2(1)     | 17(1)    |
| C(25) | 44(2)    | 26(1)    | 33(1)    | 0(1)     | 1(1)     | 10(1)    |

|       |        |        |        |       |       |       |
|-------|--------|--------|--------|-------|-------|-------|
| Cl(3) | 49(1)  | 44(1)  | 71(1)  | 6(1)  | 6(1)  | 13(1) |
| Cl(4) | 50(1)  | 42(1)  | 68(1)  | 17(1) | 3(1)  | 12(1) |
| C(27) | 55(2)  | 45(2)  | 52(2)  | 16(1) | 7(1)  | 27(2) |
| S(1)  | 31(1)  | 29(1)  | 59(1)  | 19(1) | 5(1)  | 10(1) |
| F(1)  | 90(2)  | 80(2)  | 70(2)  | 30(1) | 44(1) | 7(1)  |
| F(2)  | 124(2) | 48(1)  | 111(2) | 3(1)  | 50(2) | 33(1) |
| F(3)  | 49(1)  | 100(2) | 60(1)  | 4(1)  | -3(1) | 8(1)  |
| O(1)  | 41(1)  | 78(2)  | 120(2) | 32(2) | -2(1) | 30(1) |
| O(2)  | 46(1)  | 29(1)  | 78(2)  | 17(1) | 9(1)  | 14(1) |
| O(3)  | 66(1)  | 36(1)  | 52(1)  | 20(1) | 13(1) | 3(1)  |
| C(26) | 49(2)  | 42(2)  | 59(2)  | 17(2) | 24(2) | 11(1) |

---

**Table 5.** Hydrogen coordinates ( $\times 10^4$ ) and isotropic displacement parameters ( $\text{\AA}^2 \times 10^3$ ) for [9]OTf•CH<sub>2</sub>Cl<sub>2</sub>.

|        | x    | y     | z    | U(eq) |
|--------|------|-------|------|-------|
| H(1A)  | 1622 | 5621  | 3565 | 37    |
| H(2A)  | 2724 | 6112  | 4614 | 37    |
| H(4A)  | 6506 | 9538  | 4180 | 34    |
| H(5A)  | 5367 | 8931  | 3124 | 32    |
| H(6A)  | 4585 | 6132  | 5332 | 55    |
| H(6B)  | 3949 | 7193  | 5763 | 55    |
| H(6C)  | 5787 | 7256  | 5920 | 55    |
| H(7A)  | 7004 | 10113 | 5256 | 50    |
| H(7B)  | 8057 | 9159  | 5150 | 50    |
| H(7C)  | 7296 | 9370  | 5834 | 50    |
| H(7D)  | 7901 | 8982  | 5571 | 50    |
| H(7E)  | 6848 | 9936  | 5677 | 50    |
| H(7F)  | 7609 | 9725  | 4992 | 50    |
| H(10A) | 5554 | 11976 | 1465 | 35    |
| H(12A) | 7710 | 9394  | 743  | 33    |
| H(15A) | 4206 | 10870 | 3016 | 53    |
| H(15B) | 2752 | 9356  | 2850 | 53    |
| H(15C) | 2292 | 10689 | 3004 | 53    |
| H(16A) | 1232 | 8493  | 1703 | 57    |
| H(16B) | 1323 | 9633  | 1265 | 57    |
| H(16C) | 483  | 9632  | 1945 | 57    |
| H(17A) | 4303 | 12578 | 2277 | 69    |
| H(17B) | 2316 | 12079 | 2249 | 69    |
| H(17C) | 3221 | 12047 | 1587 | 69    |
| H(19A) | 8316 | 13664 | 1413 | 118   |
| H(19B) | 6933 | 13398 | 833  | 118   |
| H(19C) | 8873 | 14084 | 720  | 118   |
| H(20A) | 6431 | 11563 | -110 | 119   |
| H(20B) | 7526 | 10640 | -175 | 119   |
| H(20C) | 8352 | 12234 | -253 | 119   |

|        |       |       |      |     |
|--------|-------|-------|------|-----|
| H(21A) | 10114 | 12234 | 1300 | 102 |
| H(21B) | 10595 | 12858 | 643  | 102 |
| H(21C) | 9911  | 11220 | 621  | 102 |
| H(23A) | 8378  | 7743  | 882  | 64  |
| H(23B) | 6980  | 7212  | 281  | 64  |
| H(23C) | 7338  | 6119  | 648  | 64  |
| H(24A) | 5769  | 6863  | 2158 | 52  |
| H(24B) | 7664  | 7486  | 1978 | 52  |
| H(24C) | 6552  | 5869  | 1760 | 52  |
| H(25A) | 3376  | 6034  | 1098 | 54  |
| H(25B) | 4326  | 5034  | 871  | 54  |
| H(25C) | 4151  | 6049  | 405  | 54  |
| H(27A) | 7704  | 6558  | 4516 | 57  |
| H(27B) | 8912  | 5990  | 4101 | 57  |

---

**Table 6.** Crystal data and structure refinement for **16**.

|                                              |                                                            |                     |
|----------------------------------------------|------------------------------------------------------------|---------------------|
| Identification code                          | k05127a                                                    |                     |
| Empirical formula                            | C <sub>18</sub> H <sub>30</sub> F <sub>2</sub> N P         |                     |
| Formula weight                               | 329.40                                                     |                     |
| Temperature                                  | 150(1) K                                                   |                     |
| Wavelength                                   | 0.71073 Å                                                  |                     |
| Crystal system                               | Orthorhombic                                               |                     |
| Space group                                  | <i>Pnma</i>                                                |                     |
| Unit cell dimensions                         | <i>a</i> = 19.0219(7) Å                                    | $\alpha = 90^\circ$ |
|                                              | <i>b</i> = 15.6776(8) Å                                    | $\beta = 90^\circ$  |
|                                              | <i>c</i> = 6.1422(3) Å                                     | $\gamma = 90^\circ$ |
| Volume                                       | 1831.71(15) Å <sup>3</sup>                                 |                     |
| Z                                            | 4                                                          |                     |
| Density (calculated)                         | 1.194 Mg/m <sup>3</sup>                                    |                     |
| Absorption coefficient                       | 0.166 mm <sup>-1</sup>                                     |                     |
| <i>F</i> (000)                               | 712                                                        |                     |
| Crystal size                                 | 0.40 x 0.26 x 0.14 mm <sup>3</sup>                         |                     |
| Theta range for data collection              | 3.37 to 27.48°                                             |                     |
| Index ranges                                 | $-22 \leq h \leq 23, -20 \leq k \leq 20, -7 \leq l \leq 7$ |                     |
| Reflections collected                        | 8784                                                       |                     |
| Independent reflections                      | 2133 [R(int) = 0.0431]                                     |                     |
| Completeness to theta = 27.48°               | 99.5%                                                      |                     |
| Absorption correction                        | Semi-empirical from equivalents                            |                     |
| Max. and min. transmission                   | 0.978 and 0.839                                            |                     |
| Refinement method                            | Full-matrix least-squares on <i>F</i> <sup>2</sup>         |                     |
| Data / restraints / parameters               | 2133 / 0 / 125                                             |                     |
| Goodness-of-fit on <i>F</i> <sup>2</sup>     | 1.040                                                      |                     |
| Final R indices [ <i>I</i> > 2σ( <i>I</i> )] | R1 = 0.0472, wR2 = 0.1141                                  |                     |
| R indices (all data)                         | R1 = 0.0713, wR2 = 0.1288                                  |                     |
| Extinction coefficient                       | none                                                       |                     |
| Largest diff. peak and hole                  | 0.289 and -0.293 e.Å <sup>-3</sup>                         |                     |

**Table 7.** Atomic coordinates ( $\times 10^4$ ) and equivalent isotropic displacement parameters ( $\text{\AA}^2 \times 10^3$ ) for **16**. U(eq) is defined as one third of the trace of the orthogonalized  $U^{ij}$  tensor.

|       | x        | y       | z         | U(eq) |
|-------|----------|---------|-----------|-------|
| P(1)  | 2059(1)  | 2500    | 3841(1)   | 34(1) |
| F(1)  | 2629(1)  | 1768(1) | 4252(2)   | 49(1) |
| N(1)  | 2030(1)  | 2500    | 1176(3)   | 25(1) |
| C(1)  | 1404(1)  | 2500    | -174(4)   | 23(1) |
| C(2)  | 1112(1)  | 1713(1) | -845(3)   | 23(1) |
| C(3)  | 503(1)   | 1743(1) | -2123(3)  | 25(1) |
| C(4)  | 186(1)   | 2500    | -2769(4)  | 23(1) |
| C(5)  | 1409(1)  | 822(1)  | -213(3)   | 25(1) |
| C(6)  | 1224(1)  | 623(1)  | 2169(3)   | 31(1) |
| C(7)  | 2209(1)  | 749(1)  | -579(3)   | 33(1) |
| C(8)  | 1078(1)  | 102(1)  | -1586(3)  | 35(1) |
| C(9)  | -485(1)  | 2500    | -4139(4)  | 27(1) |
| C(10) | -755(3)  | 3371(3) | -4712(11) | 64(2) |
| C(11) | -1055(2) | 2037(4) | -2888(11) | 79(2) |
| C(12) | -344(3)  | 2029(4) | -6270(9)  | 81(2) |

**Table 8.** Bond lengths [Å] and angles [°] for **16**.

---

|                  |            |
|------------------|------------|
| P(1)-F(1)#1      | 1.5990(12) |
| P(1)-F(1)        | 1.5990(12) |
| P(1)-N(1)        | 1.637(2)   |
| N(1)-C(1)        | 1.452(3)   |
| C(1)-C(2)        | 1.4143(19) |
| C(1)-C(2)#1      | 1.4143(19) |
| C(2)-C(3)        | 1.401(2)   |
| C(2)-C(5)        | 1.556(2)   |
| C(3)-C(4)        | 1.389(2)   |
| C(4)-C(3)#1      | 1.389(2)   |
| C(4)-C(9)        | 1.529(3)   |
| C(5)-C(6)        | 1.537(2)   |
| C(5)-C(7)        | 1.541(2)   |
| C(5)-C(8)        | 1.543(2)   |
| C(9)-C(10)#1     | 1.501(4)   |
| C(9)-C(10)       | 1.501(4)   |
| C(9)-C(11)       | 1.515(5)   |
| C(9)-C(11)#1     | 1.515(5)   |
| C(9)-C(12)       | 1.526(5)   |
| C(9)-C(12)#1     | 1.526(5)   |
|                  |            |
| F(1)#1-P(1)-F(1) | 91.72(9)   |
| F(1)#1-P(1)-N(1) | 100.40(7)  |
| F(1)-P(1)-N(1)   | 100.40(7)  |
| C(1)-N(1)-P(1)   | 126.72(16) |
| C(2)-C(1)-C(2)#1 | 121.5(2)   |
| C(2)-C(1)-N(1)   | 119.22(10) |
| C(2)#1-C(1)-N(1) | 119.22(10) |
| C(3)-C(2)-C(1)   | 117.28(15) |
| C(3)-C(2)-C(5)   | 118.07(14) |
| C(1)-C(2)-C(5)   | 124.63(15) |
| C(4)-C(3)-C(2)   | 123.20(16) |
| C(3)#1-C(4)-C(3) | 117.5(2)   |
| C(3)#1-C(4)-C(9) | 121.27(10) |



|                      |            |
|----------------------|------------|
| C(3)-C(4)-C(9)       | 121.27(10) |
| C(6)-C(5)-C(7)       | 110.44(14) |
| C(6)-C(5)-C(8)       | 106.17(14) |
| C(7)-C(5)-C(8)       | 105.65(14) |
| C(6)-C(5)-C(2)       | 109.66(14) |
| C(7)-C(5)-C(2)       | 112.87(14) |
| C(8)-C(5)-C(2)       | 111.80(14) |
| C(10)#1-C(9)-C(10)   | 131.0(4)   |
| C(10)#1-C(9)-C(11)   | 55.8(4)    |
| C(10)-C(9)-C(11)     | 108.0(4)   |
| C(10)#1-C(9)-C(11)#1 | 108.0(4)   |
| C(10)-C(9)-C(11)#1   | 55.8(4)    |
| C(11)-C(9)-C(11)#1   | 57.3(6)    |
| C(10)#1-C(9)-C(12)   | 54.5(3)    |
| C(10)-C(9)-C(12)     | 107.4(4)   |
| C(11)-C(9)-C(12)     | 109.2(4)   |
| C(11)#1-C(9)-C(12)   | 142.4(3)   |
| C(10)#1-C(9)-C(12)#1 | 107.4(4)   |
| C(10)-C(9)-C(12)#1   | 54.5(3)    |
| C(11)-C(9)-C(12)#1   | 142.4(3)   |
| C(11)#1-C(9)-C(12)#1 | 109.2(4)   |
| C(12)-C(9)-C(12)#1   | 57.9(6)    |
| C(10)#1-C(9)-C(4)    | 114.50(19) |
| C(10)-C(9)-C(4)      | 114.50(19) |
| C(11)-C(9)-C(4)      | 108.6(2)   |
| C(11)#1-C(9)-C(4)    | 108.6(2)   |
| C(12)-C(9)-C(4)      | 109.0(2)   |
| C(12)#1-C(9)-C(4)    | 109.0(2)   |

---

Symmetry transformations used to generate equivalent atoms:

#1 x,-y+1/2,z

**Table 9.** Anisotropic displacement parameters ( $\text{\AA}^2 \times 10^3$ ) for **16**. The anisotropic displacement factor exponent takes the form:  $-2p^2 [ h^2 a^{*2} U^{11} + \dots + 2 h k a^* b^* U^{12} ]$

|       | $U^{11}$ | $U^{22}$ | $U^{33}$ | $U^{23}$ | $U^{13}$ | $U^{12}$ |
|-------|----------|----------|----------|----------|----------|----------|
| P(1)  | 40(1)    | 34(1)    | 28(1)    | 0        | -8(1)    | 0        |
| F(1)  | 58(1)    | 40(1)    | 48(1)    | 3(1)     | -25(1)   | 8(1)     |
| N(1)  | 22(1)    | 25(1)    | 27(1)    | 0        | 0(1)     | 0        |
| C(1)  | 23(1)    | 24(1)    | 21(1)    | 0        | -1(1)    | 0        |
| C(2)  | 25(1)    | 21(1)    | 23(1)    | 1(1)     | 3(1)     | 1(1)     |
| C(3)  | 26(1)    | 20(1)    | 28(1)    | -1(1)    | 0(1)     | -3(1)    |
| C(4)  | 22(1)    | 23(1)    | 25(1)    | 0        | 0(1)     | 0        |
| C(5)  | 29(1)    | 20(1)    | 27(1)    | 2(1)     | -2(1)    | 3(1)     |
| C(6)  | 35(1)    | 27(1)    | 32(1)    | 7(1)     | 1(1)     | 0(1)     |
| C(7)  | 34(1)    | 25(1)    | 39(1)    | 4(1)     | 4(1)     | 6(1)     |
| C(8)  | 44(1)    | 20(1)    | 41(1)    | -1(1)    | -7(1)    | 2(1)     |
| C(9)  | 25(1)    | 23(1)    | 34(1)    | 0        | -3(1)    | 0        |
| C(10) | 50(3)    | 34(2)    | 107(5)   | 12(3)    | -47(3)   | 0(2)     |
| C(11) | 31(2)    | 107(4)   | 98(4)    | 58(4)    | -21(3)   | -23(3)   |
| C(12) | 61(3)    | 124(5)   | 57(3)    | -45(3)   | -33(3)   | 39(3)    |

**Table 10.** Hydrogen coordinates ( $\times 10^4$ ) and isotropic displacement parameters ( $\text{\AA}^2 \times 10^3$ ) for **16**.

|        | x     | y    | z     | U(eq) |
|--------|-------|------|-------|-------|
| H(1A)  | 2437  | 2500 | 492   | 29    |
| H(3A)  | 296   | 1220 | -2569 | 30    |
| H(6A)  | 1419  | 1067 | 3115  | 47    |
| H(6B)  | 1424  | 69   | 2575  | 47    |
| H(6C)  | 712   | 605  | 2337  | 47    |
| H(7A)  | 2457  | 1058 | 576   | 49    |
| H(7B)  | 2330  | 996  | -1995 | 49    |
| H(7C)  | 2347  | 147  | -549  | 49    |
| H(8A)  | 1298  | -443 | -1209 | 52    |
| H(8B)  | 1152  | 221  | -3136 | 52    |
| H(8C)  | 572   | 72   | -1286 | 52    |
| H(10A) | -852  | 3690 | -3374 | 96    |
| H(10B) | -1188 | 3316 | -5563 | 96    |
| H(10C) | -401  | 3675 | -5572 | 96    |
| H(11A) | -1158 | 2347 | -1540 | 118   |
| H(11B) | -895  | 1459 | -2535 | 118   |
| H(11C) | -1481 | 2005 | -3781 | 118   |
| H(12A) | -772  | 2026 | -7158 | 121   |
| H(12B) | -203  | 1440 | -5953 | 121   |
| H(12C) | 34    | 2317 | -7066 | 121   |

**Table 11.** Crystal data and structure refinement for **18**.

|                                              |                                                              |                           |
|----------------------------------------------|--------------------------------------------------------------|---------------------------|
| Identification code                          | k0638                                                        |                           |
| Empirical formula                            | C <sub>18</sub> H <sub>29</sub> Cl N O <sub>2</sub> P        |                           |
| Formula weight                               | 357.84                                                       |                           |
| Temperature                                  | 150(1) K                                                     |                           |
| Wavelength                                   | 0.71073 Å                                                    |                           |
| Crystal system                               | Monoclinic                                                   |                           |
| Space group                                  | <i>P</i> 2 <sub>1</sub> / <i>n</i>                           |                           |
| Unit cell dimensions                         | <i>a</i> = 9.1257(3) Å                                       | $\alpha = 90^\circ$       |
|                                              | <i>b</i> = 13.9396(7) Å                                      | $\beta = 95.608(3)^\circ$ |
|                                              | <i>c</i> = 15.6039(6) Å                                      | $\gamma = 90^\circ$       |
| Volume                                       | 1975.45(14) Å <sup>3</sup>                                   |                           |
| Z                                            | 4                                                            |                           |
| Density (calculated)                         | 1.203 Mg/m <sup>3</sup>                                      |                           |
| Absorption coefficient                       | 0.283 mm <sup>-1</sup>                                       |                           |
| <i>F</i> (000)                               | 768                                                          |                           |
| Crystal size                                 | 0.34 x 0.30 x 0.18 mm <sup>3</sup>                           |                           |
| Theta range for data collection              | 2.68 to 27.48°                                               |                           |
| Index ranges                                 | $-11 \leq h \leq 11, -16 \leq k \leq 18, -20 \leq l \leq 20$ |                           |
| Reflections collected                        | 13533                                                        |                           |
| Independent reflections                      | 4506 [R(int) = 0.0802]                                       |                           |
| Completeness to theta = 27.48°               | 99.4%                                                        |                           |
| Absorption correction                        | Semi-empirical from equivalents                              |                           |
| Max. and min. transmission                   | 0.958 and 0.808                                              |                           |
| Refinement method                            | Full-matrix least-squares on <i>F</i> <sup>2</sup>           |                           |
| Data / restraints / parameters               | 4506 / 0 / 217                                               |                           |
| Goodness-of-fit on <i>F</i> <sup>2</sup>     | 1.053                                                        |                           |
| Final R indices [ <i>I</i> > 2σ( <i>I</i> )] | R1 = 0.0575, wR2 = 0.1372                                    |                           |
| R indices (all data)                         | R1 = 0.1084, wR2 = 0.1615                                    |                           |
| Largest diff. peak and hole                  | 0.433 and -0.613 e. Å <sup>-3</sup>                          |                           |

**Table 12.** Atomic coordinates ( $\times 10^4$ ) and equivalent isotropic displacement parameters ( $\text{\AA}^2 \times 10^3$ ) for **18**.  $U(\text{eq})$  is defined as one third of the trace of the orthogonalized  $U^{ij}$  tensor.

|       | x        | y       | z       | U(eq) |
|-------|----------|---------|---------|-------|
| Cl(1) | 4357(1)  | 3813(1) | 2201(1) | 51(1) |
| P(1)  | 3987(1)  | 2508(1) | 2677(1) | 36(1) |
| O(1)  | 4291(2)  | 1795(1) | 1921(1) | 33(1) |
| O(2)  | 2530(2)  | 2469(2) | 2996(1) | 41(1) |
| N(1)  | 5505(2)  | 2319(2) | 3344(1) | 35(1) |
| C(1)  | 5678(2)  | 1268(2) | 2133(2) | 29(1) |
| C(2)  | 6675(3)  | 1419(2) | 1442(2) | 30(1) |
| C(3)  | 8134(3)  | 1518(2) | 1648(2) | 28(1) |
| C(4)  | 8725(3)  | 1507(2) | 2563(2) | 29(1) |
| C(5)  | 7909(2)  | 1570(2) | 3234(2) | 28(1) |
| C(6)  | 6327(3)  | 1731(2) | 2967(2) | 28(1) |
| C(7)  | 5226(3)  | 183(2)  | 2234(2) | 36(1) |
| C(8)  | 4396(3)  | -147(2) | 1385(2) | 47(1) |
| C(9)  | 6589(3)  | -457(2) | 2433(2) | 40(1) |
| C(10) | 4216(3)  | 78(2)   | 2961(2) | 46(1) |
| C(11) | 9226(3)  | 1618(2) | 970(2)  | 33(1) |
| C(12) | 10018(3) | 2581(2) | 1109(2) | 49(1) |
| C(13) | 10363(3) | 805(2)  | 1079(2) | 47(1) |
| C(14) | 8476(3)  | 1574(2) | 57(2)   | 45(1) |
| C(15) | 8500(3)  | 1593(2) | 4179(2) | 32(1) |
| C(16) | 10095(3) | 1221(2) | 4303(2) | 43(1) |
| C(17) | 7554(3)  | 945(2)  | 4701(2) | 40(1) |
| C(18) | 8482(3)  | 2627(2) | 4530(2) | 41(1) |

**Table 13.** Bond lengths [Å] and angles [°] for **18**.

---

|                 |            |
|-----------------|------------|
| Cl(1)-P(1)      | 2.0064(11) |
| P(1)-O(2)       | 1.4660(18) |
| P(1)-O(1)       | 1.5872(17) |
| P(1)-N(1)       | 1.670(2)   |
| O(1)-C(1)       | 1.473(3)   |
| N(1)-C(6)       | 1.291(3)   |
| C(1)-C(2)       | 1.492(3)   |
| C(1)-C(6)       | 1.520(3)   |
| C(1)-C(7)       | 1.580(4)   |
| C(2)-C(3)       | 1.346(3)   |
| C(3)-C(4)       | 1.477(3)   |
| C(3)-C(11)      | 1.528(3)   |
| C(4)-C(5)       | 1.346(3)   |
| C(5)-C(6)       | 1.480(3)   |
| C(5)-C(15)      | 1.520(3)   |
| C(7)-C(8)       | 1.531(4)   |
| C(7)-C(9)       | 1.537(4)   |
| C(7)-C(10)      | 1.538(4)   |
| C(11)-C(14)     | 1.521(3)   |
| C(11)-C(12)     | 1.530(4)   |
| C(11)-C(13)     | 1.535(4)   |
| C(15)-C(17)     | 1.536(4)   |
| C(15)-C(16)     | 1.539(3)   |
| C(15)-C(18)     | 1.543(4)   |
| O(2)-P(1)-O(1)  | 117.32(11) |
| O(2)-P(1)-N(1)  | 120.44(11) |
| O(1)-P(1)-N(1)  | 99.78(10)  |
| O(2)-P(1)-Cl(1) | 110.54(9)  |
| O(1)-P(1)-Cl(1) | 104.18(8)  |
| N(1)-P(1)-Cl(1) | 102.41(9)  |
| C(1)-O(1)-P(1)  | 110.74(14) |
| C(6)-N(1)-P(1)  | 107.43(17) |
| O(1)-C(1)-C(2)  | 109.79(19) |

|                   |            |
|-------------------|------------|
| O(1)-C(1)-C(6)    | 103.59(18) |
| C(2)-C(1)-C(6)    | 110.16(19) |
| O(1)-C(1)-C(7)    | 105.86(18) |
| C(2)-C(1)-C(7)    | 113.0(2)   |
| C(6)-C(1)-C(7)    | 113.9(2)   |
| C(3)-C(2)-C(1)    | 120.1(2)   |
| C(2)-C(3)-C(4)    | 119.3(2)   |
| C(2)-C(3)-C(11)   | 122.8(2)   |
| C(4)-C(3)-C(11)   | 117.9(2)   |
| C(5)-C(4)-C(3)    | 125.0(2)   |
| C(4)-C(5)-C(6)    | 112.9(2)   |
| C(4)-C(5)-C(15)   | 125.8(2)   |
| C(6)-C(5)-C(15)   | 120.9(2)   |
| N(1)-C(6)-C(5)    | 124.2(2)   |
| N(1)-C(6)-C(1)    | 117.7(2)   |
| C(5)-C(6)-C(1)    | 117.7(2)   |
| C(8)-C(7)-C(9)    | 108.8(2)   |
| C(8)-C(7)-C(10)   | 109.1(2)   |
| C(9)-C(7)-C(10)   | 109.1(2)   |
| C(8)-C(7)-C(1)    | 108.3(2)   |
| C(9)-C(7)-C(1)    | 111.2(2)   |
| C(10)-C(7)-C(1)   | 110.2(2)   |
| C(14)-C(11)-C(3)  | 112.4(2)   |
| C(14)-C(11)-C(12) | 109.3(2)   |
| C(3)-C(11)-C(12)  | 108.3(2)   |
| C(14)-C(11)-C(13) | 108.2(2)   |
| C(3)-C(11)-C(13)  | 109.6(2)   |
| C(12)-C(11)-C(13) | 109.1(2)   |
| C(5)-C(15)-C(17)  | 109.8(2)   |
| C(5)-C(15)-C(16)  | 110.9(2)   |
| C(17)-C(15)-C(16) | 108.0(2)   |
| C(5)-C(15)-C(18)  | 110.4(2)   |
| C(17)-C(15)-C(18) | 109.5(2)   |
| C(16)-C(15)-C(18) | 108.2(2)   |

---

Symmetry transformations used to generate equivalent atoms:

**Table 14.** Anisotropic displacement parameters ( $\text{\AA}^2 \times 10^3$ ) for **18**. The anisotropic displacement factor exponent takes the form:  $-2p^2 [ h^2 a^* U^{11} + \dots + 2 h k a^* b^* U^{12} ]$

|       | $U^{11}$ | $U^{22}$ | $U^{33}$ | $U^{23}$ | $U^{13}$ | $U^{12}$ |
|-------|----------|----------|----------|----------|----------|----------|
| Cl(1) | 48(1)    | 42(1)    | 60(1)    | -1(1)    | -4(1)    | 9(1)     |
| P(1)  | 27(1)    | 47(1)    | 33(1)    | -7(1)    | 1(1)     | 7(1)     |
| O(1)  | 25(1)    | 42(1)    | 29(1)    | -6(1)    | -2(1)    | 8(1)     |
| O(2)  | 21(1)    | 66(1)    | 37(1)    | -8(1)    | 7(1)     | 5(1)     |
| N(1)  | 28(1)    | 47(1)    | 31(1)    | -6(1)    | 5(1)     | 5(1)     |
| C(1)  | 20(1)    | 37(2)    | 28(1)    | -1(1)    | 0(1)     | 4(1)     |
| C(2)  | 31(1)    | 36(1)    | 23(1)    | 0(1)     | 2(1)     | 5(1)     |
| C(3)  | 28(1)    | 31(1)    | 26(1)    | 0(1)     | 3(1)     | 3(1)     |
| C(4)  | 24(1)    | 35(1)    | 29(1)    | 0(1)     | 1(1)     | 2(1)     |
| C(5)  | 25(1)    | 31(1)    | 28(1)    | -1(1)    | 1(1)     | -1(1)    |
| C(6)  | 26(1)    | 33(1)    | 26(1)    | 3(1)     | 3(1)     | 0(1)     |
| C(7)  | 30(1)    | 37(2)    | 41(2)    | -5(1)    | 2(1)     | -2(1)    |
| C(8)  | 37(2)    | 44(2)    | 57(2)    | -14(2)   | -6(1)    | 0(1)     |
| C(9)  | 36(1)    | 34(2)    | 50(2)    | 3(1)     | 2(1)     | 2(1)     |
| C(10) | 38(2)    | 45(2)    | 58(2)    | 1(2)     | 15(1)    | -7(1)    |
| C(11) | 32(1)    | 39(2)    | 30(1)    | 2(1)     | 7(1)     | 3(1)     |
| C(12) | 51(2)    | 56(2)    | 41(2)    | 2(2)     | 17(1)    | -8(2)    |
| C(13) | 38(2)    | 67(2)    | 37(2)    | 2(2)     | 10(1)    | 16(1)    |
| C(14) | 41(2)    | 67(2)    | 28(1)    | 3(1)     | 9(1)     | 7(1)     |
| C(15) | 26(1)    | 42(2)    | 27(1)    | 2(1)     | 2(1)     | 0(1)     |
| C(16) | 33(1)    | 69(2)    | 27(1)    | 4(1)     | -2(1)    | 4(1)     |
| C(17) | 37(1)    | 52(2)    | 30(1)    | 7(1)     | 3(1)     | 1(1)     |
| C(18) | 46(2)    | 49(2)    | 29(1)    | -3(1)    | -1(1)    | -7(1)    |



**Table 15.** Hydrogen coordinates ( $\times 10^4$ ) and isotropic displacement parameters ( $\text{\AA}^2 \times 10^3$ ) for **18**.

|        | x     | y     | z    | U(eq) |
|--------|-------|-------|------|-------|
| H(2A)  | 6279  | 1446  | 856  | 36    |
| H(4A)  | 9762  | 1452  | 2688 | 35    |
| H(8A)  | 4018  | -798  | 1454 | 70    |
| H(8B)  | 5065  | -145  | 931  | 70    |
| H(8C)  | 3572  | 289   | 1228 | 70    |
| H(9A)  | 6282  | -1130 | 2451 | 60    |
| H(9B)  | 7096  | -276  | 2992 | 60    |
| H(9C)  | 7257  | -373  | 1984 | 60    |
| H(10A) | 3884  | -589  | 2989 | 69    |
| H(10B) | 3360  | 500   | 2847 | 69    |
| H(10C) | 4760  | 255   | 3511 | 69    |
| H(12A) | 9310  | 3105  | 992  | 73    |
| H(12B) | 10792 | 2631  | 718  | 73    |
| H(12C) | 10459 | 2625  | 1706 | 73    |
| H(13A) | 9858  | 185   | 1011 | 70    |
| H(13B) | 10899 | 842   | 1654 | 70    |
| H(13C) | 11059 | 868   | 642  | 70    |
| H(14A) | 7748  | 2091  | -27  | 67    |
| H(14B) | 7983  | 953   | -37  | 67    |
| H(14C) | 9214  | 1651  | -354 | 67    |
| H(16A) | 10139 | 577   | 4057 | 65    |
| H(16B) | 10428 | 1198  | 4919 | 65    |
| H(16C) | 10734 | 1654  | 4013 | 65    |
| H(17A) | 6531  | 1169  | 4632 | 59    |
| H(17B) | 7929  | 971   | 5311 | 59    |
| H(17C) | 7600  | 284   | 4494 | 59    |
| H(18A) | 7476  | 2880  | 4449 | 62    |
| H(18B) | 9131  | 3031  | 4219 | 62    |
| H(18C) | 8826  | 2626  | 5145 | 62    |
